# Supplementary material for: Sustained delivery of bioactive neurotrophin-3 to the injured spinal cord
Source: Royal Society of Chemistry journal article supplement (doi:10.1039/c4bm00311j), 2014-09-12
Supplement: c4bm00311j1.pdf [file c4bm00311j1.pdf]

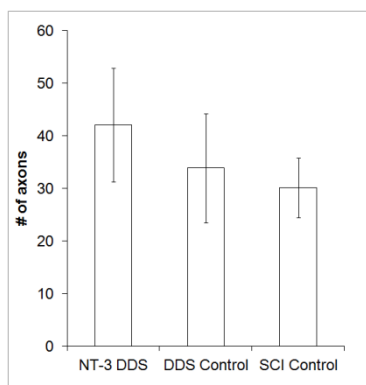

ESI Fig. 1. Axon counts in the area surrounding the lesion. An increase in the number of NF200+ axons was found for NT-3-treated animals in comparison with DDS-treated and untreated controls ( $p=0.072$ ,  $n=11$  for NT-3 DDS,  $n=6$  for DDS control,  $n=5$  for SCI control, mean  $\pm$  standard deviation plotted).

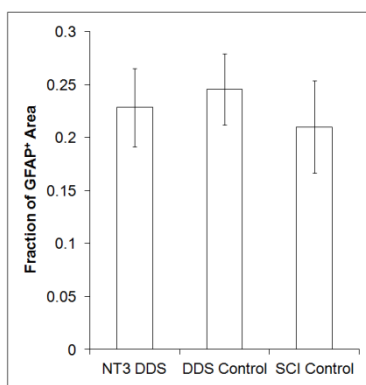

ESI Fig. 2. GFAP density in the area surrounding the lesion. No differences in the density of GFAP staining were found among the groups ( $n=11$  for NT-3 DDS,  $n=7$  for DDS control,  $n=6$  for SCI control, mean  $\pm$  standard deviation plotted).
